# Supplementary material for: Effects of High-Quality Elevation Data and Explanatory Variables on the Accuracy of Flood Inundation Mapping via Height Above Nearest Drainage
Source: Copernicus journal article supplement (doi:10.5194/egusphere-2023-1205), 2023-07-10
Supplement: Supplementary file [file egusphere-2023-1205-AC2-supplement.pdf]

---

## Reviewer 2

### Introductory Response

Dear Reviewer,

Thank you for your valuable and thorough feedback. We are grateful for your positive remarks concerning the organization, relevance, and topicality of our paper, as well as your appreciation for the importance of the outcomes depicted in Figure 6.

We acknowledge your concern regarding the generality of our results, given that they are based on a single study area with ‘low terrain slope and minimal anthropogenic influence.’ We understand that the scope of inference could be broadened with a more varied selection of study areas in future works as National Oceanic and Atmospheric Administration (NOAA)’s Office of Water Prediction (OWP) continues to expand its coverage regions. The unique characteristics of the study area were chosen to minimize extraneous variables and to allow a focused examination of the digital elevation model (DEM) quality’s impact. Nonetheless, we see the benefit of including more diverse terrain and environmental conditions in future analysis to make the findings more generalizable.

We also recognize your comments on the less intriguing results regarding the role of different spatial resolution on flood inundation map (FIM) detection and the explanatory factors and covariates’ capacity in explaining the variance of the obtained results. We value this observation and plan to delve deeper into these aspects, aiming to provide a more comprehensive understanding and clearer exposition of these relationships in future works.

Further, we are committed to revisiting the analyses and expanding on the discussions to address the concerns you’ve raised, with a particular focus on enriching the examination of spatial resolution effects and the explanatory power of different factors and covariates on the metrics’ performances.

We sincerely appreciate your insightful feedback, which provides us with a clear pathway to enhance the quality and breadth of our manuscript.

Thank you once again for your time and constructive critique.

Warm regards,

Corresponding Author

### Major Comment

**Reviewer Point P 2.1** — The most important perplexity in my reading of the paper regards the choice of the basic source of information for both evaluation and validation of the method, which is a 1-Dimensional (1D) Hydrologic Engineering Center River Analysis Center (HEC-RAS) flood inundation extents, involving hydrologic and 1D hydraulic of Saint Venant equations.

**Reply:** Thank you for your insightful comment regarding the choice of benchmark data for evaluating and validating our method. We recognize that the selection and application of validation data are pivotal to the conclusions drawn in our study. Evaluating FIM quality poses a significant challenge due to data sparsity, quality, and uncertainty inherent in available benchmark datasets. Common techniques for evaluating large-scale, low complexity FIM models—including high-water marks, remote sensing, in-situ

gauges, crowd-sourced observations, damage assessments, and higher-order models—all have limitations and uncertainties that could potentially impact the validity of conclusions drawn.

Your comment has sparked a detailed examination, leading us to segment the discussion into three main components: Base Level Engineering (BLE) cross-section usage, BLE benchmark DEM quality and resolution, and the suggestion of employing 2-Dimensional (2D) hydraulic modeling alongside high-resolution DEMs in future work.

In the following points, we delve into these components, hoping to clarify our rationale and express our willingness to explore the suggestions you have proposed for future studies.

**Reviewer Point P 2.2** — From the reading it seems that the BLE cross sections provided by Interagency Flood Risk Management (InFRM) were used both for comparison of FIMs (validation) and for the evaluation of the Height Above Nearest Drainage (HAND) metric. If this is true, I believe the authors should better specify the reason of such a choice.

**Reply:** We appreciate your observation regarding the utilization of BLE cross-sections in our analysis. These cross-sections are indeed central to our evaluation of HAND based FIMs across different DEM sources and resolutions.

The BLE cross-sections are valued for their inclusion of geo-referenced streamflow values, serving as crucial forcing information for HAND based synthetic rating curves (SRCs) and FIMs. By spatially intersecting these cross sections with the forecasting stream network of the National Water Model (NWM) we could generate reach level streamflows for mapping, aiding in a more precise evaluation.

These values are the same streamflow values used in generating the rating curves and extents within the BLE allowing for parity and fair comparison of stage-discharge relationships and mapping techniques. This approach allowed us to bypass the use of streamflow runoff models such as the NWM, which could potentially introduce additional hydro-climatic errors and uncertainties. It offered a more controlled evaluation scenario compared to using in-situ stream gages, which are often sparse and may not provide a comprehensive basis for validation.

While we introduced this methodology and its rationale in the manuscript, a more elaborate justification is provided in previous works (Aristizabal et al., 2023). To enhance clarity, we reiterated some key points from this reference in Section 2.6 of our manuscript.

We trust this response, along with the explanations provided in the manuscript and referenced work, clarifies our methodological choices. We are open to further elaborating on this approach in the manuscript to ensure a clear understanding of our validation strategy.

**Reviewer Point P 2.3** — I may imagine that such a choice can make sense in the aim of a larger comparison at the continental scale, on the other hand I think that it is hard to look for improvements based on higher quality and higher resolution DEM, whenever the benchmark has not the same quality.

**Reply:** Given the central thesis of our manuscript revolves around investigating DEM sources and resolutions alongside their effects on FIM quality, it is crucial to address the realities inherent within the benchmark dataset to uphold the integrity of our conclusions.

Upon receiving this comment, we revisited the BLE documentation to ascertain the suitability of these datasets in testing our thesis. The documentation elucidates that high-quality Light Detection and Ranging (LiDAR) data covers the entire Hydrologic Unit Code (HUC)-4 region, 1202, used as our study area and that this DEM at a 10-foot resolution was employed for hydraulic analysis and floodplain

mapping within the BLE (*Base Level Engineering Analysis: Region 6 Neches River Watershed – Lower Angelina (HUC8 - 12020005)*, 2019; *Base Level Engineering Analysis: Region 6 Neches River Watershed – Lower Neches (HUC8 - 12020003)*, 2019; *Base Level Engineering Analysis: Region 6 Neches River Watershed – Middle Neches (HUC8 - 12020002)*, 2019; *Base Level Engineering Analysis: Region 6 Neches River Watershed – Pine Island Bayou (HUC8 - 12020007)*, 2019; *Base Level Engineering Analysis: Region 6 Neches River Watershed – Upper Angelina (HUC8 - 12020004)*, 2019; *Base Level Engineering Analysis: Region 6 Neches River Watershed – Upper Neches (HUC8 - 12020001)*, 2019; *Base Level Engineering Analysis: Region 6 Neches River Watershed – Village (HUC8 - 12020006)*, 2019).

Affirmation of the utilization of high-quality, LiDAR-derived DEMs in the benchmark data lends further credibility to the positive outcomes depicted in Figure 6. Moreover, it furnishes us with additional validation that this dataset facilitates the examination of various spatial resolutions down to 1 meter (m) if feasible. It also reinforces our assertion that higher resolutions do not invariably enhance the quality of HAND based FIMs across all regions, necessitating further research to ascertain the utility of higher resolutions in varying regions, especially given their significant computational expense.

Following your comment, we have enriched the introductory paragraph of Section 2.6 to ensure the reader is well-informed about the high-resolution, high-quality LiDAR-derived DEMs employed within the BLE benchmarks. We trust that this response, coupled with our revisions to the manuscript, adequately addresses your comment and further augments the quality of our manuscript.

**Reviewer Point P 2.4** — I would suggest, maybe for future works, a comparison with flood inundation maps obtained with a shallow-water complete 2D hydraulic modeling supported by high resolution DEMs. Another feasible analysis could be carried out over real inundation maps.

**Reply:** Your suggestion raises a crucial aspect of advancing our large-scale, low-complexity FIM model by juxtaposing it with higher-order physics in subsequent investigations. To resonate with this point, we have enriched our Discussion section, articulating the potential of incorporating 2D hydraulic modeling in future research as benchmark datasets. We trust that this revision aptly addresses your insightful suggestion and amplifies the depth of discussion within our manuscript.

## Minor Issues

**Reviewer Point P 2.5** — The sentence in lines 320-321 seems not consistent with equation (1).

**Reply:** Thank you for your careful observation. We have adjusted the mentioned sentence for overall clarity and for consistency with equation (1). We hope this change addresses your concern.

**Reviewer Point P 2.6** — Lines 343 (and around it) it is not clear the difference between covariates and factors. The different role they play in the regression analysis and also how their combination are made.

**Reply:** Thank you for bringing this to our attention. We acknowledge that the terminology and the methodological explanation around covariates and factors need to be clarified. In the revised manuscript, we have elucidated these terms and their roles in the regression analysis as follows:

Factors are categorical variables in our analysis that have a finite number of distinct categories. They are utilized to group the data into different levels, each representing a category. For example, grouped

land use/land cover (LULC) could be a factor with levels of anthropogenic influence such as ‘more’ or ‘less’.

Covariates, on the other hand, are continuous variables that are assumed to have a linear relationship with the dependent variable. For example, channel slope could serve as covariates in our analysis.

In our regression analysis, we included both covariates and factors to capture the variance in the dependent variable more comprehensively. The combination of covariates and factors was carried out by including interaction terms in the regression model. Interaction terms are created by multiplying a covariate and a factor or two factors, which allows us to investigate whether the effect of one variable depends on the level of the other variable.

We hope that this explanation clarifies the different roles of covariates and factors, and the methodology of combining them in our regression analysis. We have augmented Section 2.6.1 which introduces these terms to ensure they are properly conveyed to the interested reader.

**Reviewer Point P 2.7** — It is not clear if and/or how the spatial resolution of DEM affects results in figures 11 and 12.

**Reply:** Your observation regarding the potential interaction between spatial resolution and LULC is insightful. We, too, recognized that there could be a significant interaction between these variables, which prompted us to conduct a regression analysis to explore this possibility further. The outcomes of this analysis, primarily depicted in Figure 7, reveal that the interaction between spatial resolution and stream order is only minimal in only the case of true positive rate (TPR), indicating that in our study, spatial resolution does not significantly interact with other variables. This observation was initially mentioned in lines 497-500, underlining the lack of interaction between spatial resolution and LULC in affecting FIM quality. To clarify this aspect further, we have enhanced the caption of Figure 12 to explicitly state that our analysis found no significant interaction between LULC and spatial resolution.

## References

- Aristizabal, F., Salas, F., Petrochenkov, G., Grout, T., Avant, B., Bates, B., . . . Judge, J. (2023). Extending height above nearest drainage to model multiple fluvial sources in flood inundation mapping applications for the us national water model. *Water Resources Research*, e2022WR032039.
- Base level engineering analysis: Region 6 neches river watershed – lower angelina (huc8 - 12020005)* (MIP Deliverable No. 16-09-0654S). (2019, August). Strategic Alliance for Risk Reduction II (STARRII). (FEMA IDIQ Contract: HSF60-15-D-0005)
- Base level engineering analysis: Region 6 neches river watershed – lower neches (huc8 - 12020003)* (MIP Deliverable No. 16-09-0654S). (2019, August). Strategic Alliance for Risk Reduction II (STARRII). (FEMA IDIQ Contract: HSF60-15-D-0005)
- Base level engineering analysis: Region 6 neches river watershed – middle neches (huc8 - 12020002)* (MIP Deliverable No. 16-09-0654S). (2019, August). Strategic Alliance for Risk Reduction II (STARRII). (FEMA IDIQ Contract: HSF60-15-D-0005)
- Base level engineering analysis: Region 6 neches river watershed – pine island bayou (huc8 - 12020007)* (MIP Deliverable No. 16-09-0654S). (2019, August). Strategic Alliance for Risk Reduction II (STARRII). (FEMA IDIQ Contract: HSF60-15-D-0005)

*Base level engineering analysis: Region 6 neches river watershed – upper angelina (huc8 - 12020004)*  
(MIP Deliverable No. 16-09-0654S). (2019, August). Strategic Alliance for Risk Reduction II  
(STARRII). (FEMA IDIQ Contract: HSFE60-15-D-0005)

*Base level engineering analysis: Region 6 neches river watershed – upper neches (huc8 - 12020001)*  
(MIP Deliverable No. 16-09-0654S). (2019, August). Strategic Alliance for Risk Reduction II  
(STARRII). (FEMA IDIQ Contract: HSFE60-15-D-0005)

*Base level engineering analysis: Region 6 neches river watershed – village (huc8 - 12020006)* (MIP  
Deliverable No. 16-09-0654S). (2019, August). Strategic Alliance for Risk Reduction II  
(STARRII). (FEMA IDIQ Contract: HSFE60-15-D-0005)
